# Supplementary material for: T cell mediated immunity against influenza H5N1 nucleoprotein, matrix and hemagglutinin derived epitopes in H5N1 survivors and non-H5N1 subjects
Source: PeerJ. 2021 Mar 10;9:e11021. doi: 10.7717/peerj.11021 (PMC7955671; doi:10.7717/peerj.11021)
Supplement: Supplemental Information 4 [file peerj-09-11021-s004.docx]

**Table S4.** Magnitude and longevity of T cell responses to H5N1 NP, M and HA peptides in H5N1 survivors

| **Survivor no.** | **Time after disease onset** | ***Ex vivo* IFN-γ responses** | | | | | |
| --- | --- | --- | --- | --- | --- | --- | --- |
| **NP peptide** | **SFCs/106 PBMCs** | **M peptide** | **SFCs/106 PBMCs** | **HA peptide** | **SFCs/106 PBMCs** |
| 1 | 1y 6m | NP1-20 | 260 | M1121-140 | 150 | ND | ND |
| NP111-130 | 90 | M1201-220 | 114 |  |  |
| 2y 1m | ND | ND | ND | ND | HA461-480 | 133 |
| 3y 3m | NP1-20 | 259 | M1121-140 | 81 | ND | ND |
| NP111-130 | 56 | M1201-220 | 83 |  |  |
| 3y 8m | NP1-20 | 266 | ND | ND | ND | ND |
| NP111-130 | 63 |  |  |  |  |
| 4y 2m | NP1-20 | 274 | M1121-140 | 60 | ND | ND |
| NP111-130 | 51 | M1201-220 | 67 |  |  |
| 2 | 2y 2 m | NP411-430 | 631 | M11-20 | 95 | ND | ND |
|  |  | M91-110 | 53 |  |  |
|  |  | M1241-252 | 83 |  |  |
| 2y 8m | ND | ND | ND | ND | HA41-60 | 67 |
|  |  |  |  | HA251-270 | 66 |
|  |  |  |  | HA291-310 | 59 |
| 3y 2m | ND | ND | M11-20 | 108 | ND | ND |
|  |  | M191-110 | 52 |  |  |
|  |  | M1241-252 | 90 |  |  |
| 3y 10m | NP411-430 | 568 | ND | ND | ND | ND |
| 4y 3m | NP411-430 | 522 | M11-20 | 84 | ND | ND |
|  |  | M191-110 | 59 |  |  |
|  |  | M1241-252 | 84 |  |  |
| 3 | 5m | No response | No response | ND | ND | ND | ND |
| 11m | No response | No response | ND | ND | ND | ND |
| 1y 5m | No response | No response | ND | ND | ND | ND |
| 2y 2m | No response | No response | ND | ND | ND | ND |
| 2y 7m | No response | No response | ND | ND | ND | ND |
| 3y 1m | No response | No response | ND | ND | ND | ND |
| 4 | 3y 3m | No response | No response | ND | ND | ND | ND |

y, year; m, month; ND; not determined; No response means that the numbers of spot forming cells (SFCs) in the ELISpot reaction wells using peptide pools are not greater than 2 times of the negative control

NP1-20 MASQGTKRSYEQMETGGERQ NP111-130 YDKEEIRRIWRQANNGEDAT

NP411-430 TFSVQRNLPFERATIMAAFT M11-20 MSLLTEVETYVLSIIPSGPL

M191-110 NNMDRAVKLYKKLKREITFH M1121-140 TGALASCMGLIYNRMGTVTT

M1201-220 EAMEIANQARQMVQAMRTIG M1241-252 QKRMGVQMQRFK

HA41-60 TVTHAQDILEKTHNGKLCDL HA251-270  PNDAINFESNGNFIAPEYAY

HA461-480  VKNLYDKVRLQLRDNAKELG HA291-310 NTKCQTPMGAINSSMPFHNI
